# Supplementary material
Source: MDPI journal article supplement (https://www.mdpi.com/2071-1050/16/2/743)
Supplement: s1 [file s1]

Table S1 Instrument Parameter List

| Instrument name                     | Meteorological parameters | range                   | resolution          |
|-------------------------------------|---------------------------|-------------------------|---------------------|
| SMART METER Wireless Data Collector | Ta (°C)                   | -20°C~60°C              | ±0.3°C              |
|                                     | RH (%)                    | 0%~95%                  | ±3%                 |
| Solar Power Meter TES-1333          | G (W/m <sup>2</sup> )     | 0~2000 W/m <sup>2</sup> | 0.1W/m <sup>2</sup> |
| Air Velocity Meter TM-403           | Va (m/s)                  | 0~25 m/s                | 0.1m/s              |
| JTR04 Global Thermometer            | Tg (°C)                   | 0~80°C                  | ±1°C                |
|                                     | Ta (°C)                   | -40°C~65°C              | ±0.1°C              |
| Vantage Pro2                        | RH (%)                    | 0~100%                  | 1%                  |
|                                     | Va (m/s)                  | 0~40 m/s                | 0.1m/s              |
|                                     | G(W/m <sup>2</sup> )      | 0~2000 W/m <sup>2</sup> | 0.1W/m <sup>2</sup> |

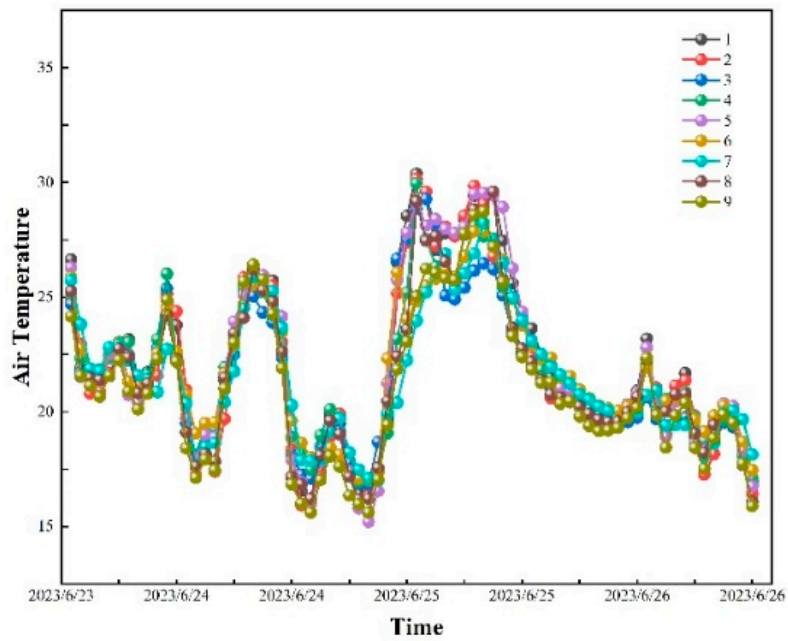

Figure S1 Temperature change 24 June-26 June.
